# Supplementary material for: Placebo analgesia and nocebo hyperalgesia across species: direct neural comparisons between rats and humans
Source: Research Square preprint supplement (doi:10.21203/rs.3.rs-5590281/v1), 2025-03-19
Supplement: Supplementary file 1 [file f9613113137b03db62d7405f.xlsx]

## Sheet: Estimation Statistics
	Supplementary Table 1: Results from Estimation Statistics for all ROIs for rats and humans. *indicates the ROIs without equivalent in the other species.
	Rat												Human
	Minimal context					Enhanced context
		Placebo vs. Control		Nocebo vs. Control			Placebo vs. Control		Nocebo vs. Control					Placebo vs. Control		Nocebo vs. Control
	ROI	Cohen's D	CI	Cohen's D	CI	ROI	Cohen's D	CI	Cohen's D	CI		RAT ROI	ROI	Hedges' g	CI	Hedges' g	CI
	Left gracile	1.02	-0.207, 2.18	0.163	-0.931, 1.16	Left gracile	0.67	-0.514, 1.75	-0.208	-1.27, 0.834		Left gracile	Left gracile	-0.193	-0.804, 0.454	0.0867	-0.709, 0.784
	Right Gracile	2.14	0.685, 3.99	1.03	-0.146, 2.37	Right Gracile	1.19	0.0307, 2.27	0.654	-0.454, 1.69		Right Gracile	Right Gracile	0.292	-0.302, 0.839	0.621	0.068, 1.15
	rostral PVT	0.595	-0.475, 1.49	-0.402	-1.63, 0.683	rostral PVT	-0.00577	-1.2, 1.09	-0.762	-1.96, 0.437		rostral PVT	Left rostral PVT	0.0665	-0.45, 0.62	0.295	-0.253, 0.932
													right rostral PVT	-0.296	-0.818, 0.224	0.431	-0.038, 1.03
	caudal PVT	0.597	-0.583, 1.62	0.1	-1.01, 1.2	caudal PVT	-0.148	-1.28, 0.963	-0.598	-1.71, 0.505		caudal PVT	left caudal PVT	-0.0036	-0.558, 0.547	0.292	-0.253, 0.972
													right caudal PVT	-0.268	0.799, 0.246	0.454	-0.0576, 1.03
	PVH left	-0.253	-1.29, 0.932	-0.552	-1.58, 0.687	PVH left	-0.0454	-1.15, 1.06	-0.672	-1.6, 0.433		PVH left	Left PVH	0.584	-0.0726, 1.08	0.616	-0.0886, 1.1
	PVH right	0.0186	-1.05, 1.28	-0.306	-1.41, 0.797	PVH right	0.0453	-1.03, 1.16	-0.543	-1.53, 0.698		PVH right	Right PVH	0.318	-0.253, 0.777	0.525	-0.129, 1.03
	Septal	0.623	-0.705, 1.6	0.0895	-1.08, 1.18	Septal	0.187	-0.957, 1.3	-0.484	-1.57, 0.583		Septal	Left Septal	0.318	-0.239, 0.875	0.235	-0.248, 0.736
													Right Septal	0.255	-0.246, 0.804	0.097	-0.361, 0.637
	Left SRD	0.288	-0.794, 1.53	0.489	-0.66, 1.57	Left SRD	-0.326	-1.35, 0.763	0.343	-0.768, 1.39		Left SRD	Left SRD	0.344	-0.18, 0.851	0.16	-0.478, 1.03
	Right SRD	0.293	-0.804, 1.35	-0.494	-1.47, 0.636	Right SRD	0.327	-0.732, 1.47	-0.31	-1.45, 0.803		Right SRD	Right SRD	0.325	-0.331, 0.858	0.231	-0.416, 1.02
	Rostral RVM	-0.231	-1.4, 0.82	-1.12	-2.31, 0.0281	Rostral RVM	-0.167	-1.39, 0.901	-0.243	-1.38, 0.82		Rostral RVM	Rostral RVM	-0.488	-0.93, 0.0205	-0.578	-1.18, 0.111
	Caudal RVM	-0.168	-1.36, 0.889	0.165	-0.909, 1.22	Caudal RVM	-0.246	-1.38, 0.84	0.158	-0.931, 1.27		Caudal RVM	Caudal RVM	-0.528	-0.905, -0.622	-0.646	-1.2, -0.0236
	Caudal DR	-0.115	-1.22, 1.05	-0.528	-1.5, 0.594	Caudal DR	-0.15	-1.14, 0.99	-0.547	-1.57, 0.595		Caudal DR	DR	-0.031	-0.558, 0.519	-0.043	-0.632, 0.515
	Rostral DR	-0.0373	-1.13, 1.11	0.000119	-1.12, 1.11	Rostral DR	-0.617	-1.61, 0.464	-0.0235	-1.09, 1.09		Rostral DR
	Left cVLPAG	0.741	-0.36, 1.83	0.124	-0.98, 1.23	Left cVLPAG	-0.0394	1.23, 1.08	0.246	-0.905, 1.29		Left cVLPAG	Left cVLPAG	-0.0392	-0.517, 0.513	-0.166	-0.645, 0.42
	Right cVLPAG	0.47	-0.771, 1.62	-0.2	-1.28, 0.928	Right cVLPAG	-0.0551	-1.17, 1.06	-0.225	-1.45, 0.96		Right cVLPAG	Right cVLPAG	0.0418	-0.452, 0.557	0.0303	-0.507, 0.806
	Left rVLPAG	0.283	-0.896, 1.33	-0.457	-1.67, 0.684	Left rVLPAG	-0.387	-1.53, 0.72	-0.423	-1.58, 0.644		Left rVLPAG	Left rVLPAG	-0.0061	-0.53, 0.494	0.0938	-0.421, 0.667
	Right rVLPAG	0.143	-0.998, 1.24	-0.341	-1.46, 0.864	Right rVLPAG	-0.345	-1.4, 0.741	-0.232	-1.39, 0.84		Right rVLPAG	Right rVLPAG	-0.201	-0.696, 0.356	0.0114	-0.548, 0.511
	Left cLPAG	0.601	-0.517, 1.81	0.318	-0.754, 1.44	Left cLPAG	0.204	-0.92, 1.28	-0.032	-1.15, 1.06		Left cLPAG	Left cLPAG	0.0486	-0.427, 0.553	0.0734	-0.438, 0.628
	Right cLPAG	0.875	-0.338, 2.11	0.379	-0.741, 1.76	Right cLPAG	0.0707	-1.04, 1.2	0.066	-1.05, 1.37		Right cLPAG	Right cLPAG	0.0837	-.396, 0.614	-0.024	-0.581, 0.678
	Left rLPAG	0.839	-0.227, 1.71	0.187	-0.913, 1.29	Left rLPAG	-0.39	-1.52, 0.686	-0.343	-1.44, 0.719		Left rLPAG	Left rLPAG	0.0902	-0.351, 0.658	-0.0037	-0.399, 0.502
	Right rLPAG	0.314	-0.887, 1.38	-0.0456	-1.16, 1.05	Right rLPAG	-0.0935	-1.26, 0.987	0.0262	-1.12, 1.07		Right rLPAG	Right rLPAG	-0.0691	-0.571, 0.444	0.0516	-0.467, 0.545
	Left mPB	0.53	-0.682, 1.57	-0.517	-1.7, 0.544	Left mPB	-0.108	-1.35, 0.949	-0.461	-1.64, 0.608		Left mPB	Left mPB	-0.253	-0.85, 0.258	-0.625	-1.33, -0.0396
	Right mPB	0.115	-1.16, 1.34	-0.907	-1.89, 0.227	Right mPB	-0.448	-1.66, 0.774	-0.232	-1.37, 0.913		Right mPB	Right mPB	0.142	-0.421, 0.542	-0.258	-0.945, 0.233
	Left lPB	0.274	-0.872, 1.48	-0.54	-1.57, 0.521	Left lPB	-0.118	-1.21, 1.13	-0.718	-1.65, 0.292		Left lPB	Left lPB	-0.0556	-0.613, 0.522	-0.39	-1.04, 0.200
	Right lPB	0.614	-0.65, 1.99	0.645	-0.44, 1.79	Right lPB	0.204	-0.865, 1.28	0.354	-0.771, 1.42		Right lPB	Right lPB	0.0515	-0.482, 0.517	-0.072	-0.562, 0.35
	Infralimbic left	0.0408	-1.12, 1.21	-0.415	-1.54, 0.707	Infralimbic left	-0.0988	-1.25, 1.05	-0.96	-2.04, 0.154		Infralimbic left	Infralimbic left	-0.0524	-0.58, 0.437	0.248	-0.273, 0.731
	Infralimbic right	-0.228	-1.55, 0.875	-0.603	-1.8, 0.556	Infralimbic right	-0.167	-1.42, 0.991	-1.15	-2.44, 0.0388		Infralimbic right	Infralimbic right	-0.247	-0.798, 0.26	0.243	-0.329, 0.733
	Prelimbic left	0.493	-0.686, 1.59	-0.14	-1.34, 0.988	Prelimbic left	0.251	-0.9, 1.27	-0.694	-1.94, 0.445		Prelimbic left	Prelimbic left	-0.0103	-0.566, 0.505	0.307	-0.429, 0.758
	Prelimbic right	0.441	-0.684, 1.56	-0.31	-1.48, 0.831	Prelimbic right	0.188	-0.98, 1.27	-0.6	-1.77, 0.502		Prelimbic right	Prelimbic right	-0.00267	-0.596, 0.522	0.233	-0.497, 0.775
	Cg1 av left (rostral + middle)	0.0786	-1.03, 1.14	-0.452	-1.52, 0.655	Cg1 av left (rostral + middle)	0.15	-1.03, 1.25	-0.563	-1.68, 0.562		Cg1 av left (rostral + middle)	ACC-Cg1 left	0.0711	-0.501, 0.596	0.44	-0.0644, 0.92
	Cg1 av right (rostral + middle)	0.503	-0.623, 1.49	-0.268	-1.42, 0.818	Cg1 av right (rostral + middle)	0.501	-0.648, 1.65	-0.371	-1.53, 0.718		Cg1 av right (rostral + middle)	ACC-Cg1 right	0.184	-0.432, 0.71	0.419	-0.126, 0.902
	Cg 1 caudal left	0.926	-0.327, 1.98	0.231	-0.907, 1.25	Cg 1 caudal left	0.599	-0.559, 1.77	-0.197	-1.38, 0.96		Cg 1 caudal left	MCC-Cg1 left	-0.0006	-0.598, 0.475	-0.137	-0.698, 0.472
	Cg 1 caudal right	0.539	-0.704, 2.18	0.051	-1.04, 1.29	Cg 1 caudal right	0.383	-0.759, 1.69	-0.365	-1.36, 0.767		Cg 1 caudal right	MCC-Cg1 right	0.0441	-0.527, 0.537	-0.331	-0.903, 0.321
	Cg2 caudal let	0.426	-0.709, 1.41	-0.595	-1.6, 0.549	Cg2 caudal let	0.348	-0.783, 1.45	-0.593	-1.74, 0.503		Cg2 caudal let	MCC-Cg2 left	0.114	-0.47, 0.605	0.172	-0.344, 0.662
	Cg2 caudal right	0.436	-0.665, 1.44	-0.373	-1.5, 0.742	Cg2 caudal right	0.25	-0.92, 1.3	-0.786	-1.83, 0.289		Cg2 caudal right	MCC-Cg2 right	0.184	-0.4, 0.686	0.134	-0.383, 0.64
	Cg2 rostral left	-0.0788	-1.14, 1.03	-0.777	-1.82, 0.342	Cg2 rostral left	0.0386	-1.08, 1.16	-0.649	-1.78, 0.479		Cg2 rostral left
	Cg2 rostral right	0.381	-0.721, 1.45	-0.527	-1.72, 0.625	Cg2 rostral right	0.342	-0.774, 1.52	-0.437	-1.68, 0.696		Cg2 rostral right
	BNST left	0.124	-1.01, 1.18	0.21	-0.891, 1.26	BNST left	0.0863	-1.03, 1.22	-0.551	-1.73, 0.579		BNST left	BNST left	0.323	-0.203, 0.904	0.0524	-0.347, 0.726
	BNST right	0.273	-0.939, 1.87	0.419	-0.704, 1.39	BNST right	0.0003	-1.11, 1.06	-0.529	-1.53, 0.652		BNST right	BNST right	0.179	-0.338, 0.713	0.255	-0.287, 0.863
	Nacc core left	0.55	-0.681, 1.72	0.247	-0.945, 1.2	Nacc core left	0.501	-0.743, 1.43	-0.3	-1.63, 0.785		Nacc core left	Nacc core left	0.202	-0.327, 0.75	0.394	-0.0957, 0.96
	Nacc core right	0.14	-0.98, 1.28	0.283	-0.92, 1.26	Nacc core right	0.577	-0.604, 1.53	-0.0742	-1.23, 0.975		Nacc core right	Nacc core right	0.0298	-0.506, 0.571	0.523	-0.0237, 1.06
	Nacc shell left	0.941	-0.381, 2.09	0.734	-0.431, 1.67	Nacc shell left	0.74	-0.319, 1.6	0.00916	-1.15, 1.13		Nacc shell left	Nacc shell left	0.0147	-0.501, 0.551	0.212	-0.304, 0.781
	Nacc shell right	0.673	-0.391, 1.58	0.521	-0.571, 1.46	Nacc shell right	-0.0811	-1.17, 1.11	0.439	-0.73, 0.151		Nacc shell right	Nacc shell right	-0.157	-0.697, 0.382	0.239	-0.249, 0.818
	Amy BLA avg left	0.333	-0.816, 1.37	0.193	-0.917, 1.24	Amy BLA avg left	0.497	-0.643, 1.55	-0.628	-1.86, 0.576		Amy BLA avg left	Amy BLA avg left	0.199	-0.332, 0.679	0.419	-0.0922, 0.947
	Amy BLA avg right	0.567	-0.571, 1.54	0.39	-0.757, 1.55	Amy BLA avg right	0.887	-0.275, 1.69	0.232	-1.2, 1.43		Amy BLA avg right	Amy BLA avg right	0.428	-0.112, 0.872	0.282	-0.195, 0.796
	Amy CeA avg left	-0.0645	-1.18, 1.04	-0.415	-1.51, 0.722	Amy CeA avg left	0.328	-0.797, 1.29	-0.678	-1.88, 0.607		Amy CeA avg left	Amy CeA avg left	-0.129	-0.709, 0.5	0.254	-0.366, 0.773
	Amy CeA avg right	0.444	-0.71, 1.5	0.225	-0.881, 1.32	Amy CeA avg right	0.621	-0.553, 1.53	0.155	-1.17, 1.39		Amy CeA avg right	Amy CeA avg right	0.122	-0.436, 0.658	0.442	-0.103, 1.04
	Amy MeA av left	-0.661	-1.88, 0.577	-0.425	-1.94, 0.775	Amy MeA av left	-0.154	-121, 0.95	-0.489	-1.72, 0.732		Amy MeA av left	Amy MeA av left	0.0945	-0.517, 0.683	0.0825	-0.509, 0.697
	Amy MeA av right	-0.202	-1.43, 1.0	-0.184	-1.42, 0.921	Amy MeA av right	0.0888	-1.01, 1.2	-0.353	-1.43, 0.894		Amy MeA av right	Amy MeA av right	0.264	-0.262, 0.757	0.313	-0.149, 0.764
	S1 av left	0.643	-0.454, 1.46	-0.386	-1.75, 0.688	S1 av left	0.36	-0.756, 1.47	-0.109	-1.39, 1.12		S1 av left	S1 Left	-0.639	-1.14, -0.123	-0.00362	-0.605, 0.567
	S1 av right	0.814	-0.295, 1.99	-0.393	-1.53, 0.743	S1 av right	0.503	-0.613, 1.77	-0.529	1.68, 0.59		S1 av right	S1 Right	-0.102	-0.594, 0.399	-0.335	-0.924, 0.235
	S1 caudal left	0.383	-0.771, 1.38	-0.302	-1.59, 0.78	S1 caudal left )	0.604	-0.493, 1.75	0.0431	-1.24, 1.29		S1 caudal left
	S1 caudal right	0.751	-0.346, 1.88	-0.473	-1.65, 0.631	S1 caudal right	0.76	-0.369, 2.06	-0.315	-1.49, 0.821		S1 caudal right
	S1 Rostral left	0.347	-0.862, 1.32	-0.405	-1.78, 0.855	S1 Rostral left	0.0115	-1.16, 1.09	-0.322	-1.62, 0.863		S1 Rostral left
	S1 Rostral right	0.948	-0.468, 3.08	-0.172	-1.38, 1.12	S1 Rostral right	0.34	-0.903, 1.69	-0.795	-1.82, 0.369		S1 Rostral right
	M1 average left	0.204	-1.16, 1.23	-0.135	-1.32, 0.931	M1 average left	0.232	-0.911, 1.45	-0.532	-1.78, 0.727		M1 average left	M1 Left	-0.0156	-0.546, 0.541	0.163	-0.396, 0.821
	M1 average right	0.544	-0.474, 1.6	0.0235	-1.17, 1.1	M1 average right	0.381	-0.768, 1.68	-0.581	-1.89, 0.591		M1 average right	M1 Right	-0.0238	-0.525, 0.496	-0.387	-1.03, 0.241
	M1 Caudal left	0.337	-0.976, 1.34	0.18	-1.03, 1.15	M1 Caudal left	0.387	-0.764, 1.62	-0.304	-1.61, 0.929		M1 Caudal left
	M1 Caudal right	0.282	-0.75, 1.38	-0.00443	-1.18, 1.03	M1 Caudal right	0.462	-0.727, 1.68	-0.313	-1.65, 0.887		M1 Caudal right
	M1 rostral left	0.052	-1.15, 1.15	-0.471	-1.65, 0.844	M1 rostral left	0.0754	-1.06, 1.29	-0.794	-2.02, 0.435		M1 rostral left
	M1 rostral right	0.89	-0.28, 1.99	0.202	-1.05, 1.37	M1 rostral right	0.371	-0.848, 1.71	-0.727	-1.99, 0.409		M1 rostral right
	Caud LC (left)	-0.184	-1.4, 0.961	-0.573	-1.71, 0.656	Caud LC (left)	-0.318	-1.4, 0.871	-0.0126	-1.15, 1.13		Caud LC (left)	Caud LC (left)	-0.152	-0.679, 0.418	-0.503	-1.08, 0.0411
	Caud LC (right)	-0.0737	-1.22, 1.02	-1.03	-2.17, 0.272	Caud LC (right)	-0.666	-1.8, 0.637	-0.256	-1.42, 0.877		Caud LC (right)	Caud LC (right)	0.0878	-0.396, 0.584	-0.184	-0.725, 0.33
	Rostral LC (left)	0.438	-0.627, 1.65	0.0183	-1.3, 1.17	Rostral LC (left)	0.11	1.39, 1.44	-0.806	-2.43, 0.32		Rostral LC (left)	Rostral LC (left)	-0.359	-0.882, 0.216	-0.537	-1.1, 0.047
	Rostral LC (right)	-0.103	-1.25, 1.05	-0.221	-1.37, 0.874	Rostral LC (right)	-0.274	-1.75, 1.04	-0.471	-1.58, 0.635		Rostral LC (right)	Rostral LC (right)	0.145	-0.35, 0.687	-0.415	-0.884, 0.025
	OFC (left)	0.428	-0.75, 1.4	-0.578	-1.72, 0.51	OFC (left)	0.556	-0.767, 1.76	-0.239	-1.7, 1.27		OFC (left)	OFC (left)	-0.186	-0.731, 0.39	0.949	0.363, 1.58
	OFC (right)	-0.29	-1.47, 0.766	-0.546	-1.74, 0.62	OFC (right)	-0.156	-1.29, 1.07	-0.827	-2.16, 0.629		OFC (right)	OFC (right)	-0.123	-0.63, 0.54	-0.125	-0.574, 0.411
	Claustrum (left)	0.304	-0.859, 1.36	-0.606	-1.6, 0.412	Claustrum (left)	0.707	-0.508, 1.95	-0.378	-1.38, 0.906		Claustrum (left)	Claustrum (left)	-0.155	-0.678, 0.379	0.0969	-0.461, 0.644
	Claustrum (right)	-0.0658	-1.12, 1.01	-0.484	-1.49, 0.551	Claustrum (right)	0.269	-0.812, 1.48	-0.68	-1.52, 0.332		Claustrum (right)	Claustrum (right)	-0.207	-0.729, 0.323	-0.195	-0.724, 0.381
	Anterior insula (left)	0.364	-0.692, 1.43	-0.646	-1.69, 0.424	Anterior insula (left)	0.402	-0.843, 1.63	-0.453	-1.64, 0.884		Anterior insula (left)	Anterior insula (left)	-0.00137	-0.538, 0.505	0.186	-0.365, 0.787
	Anterior insula (right)	-0.0469	-1.2, 0.992	-0.475	-1.55, 0.577	Anterior insula (right)	0.181	-0.933, 1.38	-0.993	-1.87, 0.0729		Anterior insula (right)	Anterior insula (right)	0.136	-0.431, 0.647	-0.114	-0.681, 0.478
	Posterior insula (left)	0.441	-0.697, 1.39	-0.423	-1.6, 0.759	Posterior insula (left)	0.535	-0.616, 1.67	-0.131	1.23, 0.982		Posterior insula (left)	Posterior insula (left)	-0.00465	-0.519, 0.493	0.059	-0.468, 0.613
	Posterior insula (right)	0.369	-0.808, 1.32	-0.255	-1.47, 0.839	Posterior insula (right)	0.565	-0.589, 1.54	-0.196	-1.39, 0.832		Posterior insula (right)	Posterior insula (right)	-0.077	-0.618, 0.475	-0.302	-0.831, 0.229
	Anterior olfactory*	0.119	-1.05, 1.28	-0.0311	-1.16, 1.18	Anterior olfactory*	-0.00287	-1.12, 1.11	-0.22	-1.36, 0.9		Anterior olfactory*	dDLPFC left*	0.395	-0.238, 0.87	0.151	-0.54, 0.47
	Anterior olfactory right*	0.161	-0.963, 1.36	-0.0958	-1.19, 1.12	Anterior olfactory right*	0.22	-0.945, 1.28	-0.325	-1.47, 0.72		Anterior olfactory right*	dDLPFC right*	0.182	-0.403, 0.694	0.508	-0.907, 0.201
	Piriform cortex*	0.209	-1.0, 1.28	-0.439	-1.57, 0.699	Piriform cortex*	0.36	-0.76, 1.45	-0.242	-1.4, 0.89		Piriform cortex*	vDLPFC left*	0.126	-0.496, 0.614	0.648	-0.496, 0.643
	Piriform cortex right*	0.107	-1.08, 1.13	-0.456	-1.64, 0.642	Piriform cortex right*	0.325	-0.823, 1.43	-0.296	-1.53, 0.794		Piriform cortex right*	vDLPFC right*	0.337	-0.305, 0.801	0.232	-0.795, 195
